# Supplementary material for: Polymeric tungsten carbide nanoclusters as potential non-noble metal catalysts for CO oxidation
Source: Royal Society of Chemistry journal article supplement (doi:10.1039/d2nr06097c), 2022-01-01
Supplement: d2nr06097c1.pdf [file d2nr06097c1.pdf]

Electronic Supplementary Information for

**Polymeric tungsten carbide nanoclusters as potential non-noble  
metal catalysts for CO oxidation**

Ya-Ling Ye<sup>a</sup>, Wen-Lu Wang<sup>a</sup>, Wei-Ming Sun<sup>\*a,b</sup>, Jinlong Yang<sup>\*b</sup>

*<sup>a</sup>The Department of Basic Chemistry, The School of Pharmacy, Fujian Medical University, Fuzhou,  
Fujian, 350108, People's Republic of China.*

*E-mail: sunwm@fjmu.edu.cn*

*<sup>b</sup>School of Chemistry and Materials Science, University of Science and Technology of China, Hefei,  
Anhui 230026, People's Republic of China*

*E-mail: jlyang@ustc.edu.cn*

## Table of Contents

|                                                                                                                                                                             |            |
|-----------------------------------------------------------------------------------------------------------------------------------------------------------------------------|------------|
| <b>1. Figures</b> .....                                                                                                                                                     | <b>S4</b>  |
| <b>Figure S1.</b> The optimized structures of $(WC)_n$ and $Pt_n$ ( $n = 1, 2, 4,$ and $6$ ).....                                                                           | <b>S4</b>  |
| <b>Figure S2.</b> The evolution of VIE, VEA, $\eta$ , and $\omega$ with the increasing size of $(WC)_n$ and $Pt_n$ species.....                                             | <b>S5</b>  |
| <b>Figure S3.</b> ESP diagrams of $(WC)_n$ and $Pt_n$ .....                                                                                                                 | <b>S6</b>  |
| <b>Figure S4.</b> Electron spin density diagrams of $(WC)_n$ and $Pt_n$ .....                                                                                               | <b>S7</b>  |
| <b>Figure S5.</b> Low-lying isomers of $X_n-O_2$ complexes.....                                                                                                             | <b>S8</b>  |
| <b>Figure S6.</b> Low-lying isomers of $X_n-CO$ complexes.....                                                                                                              | <b>S9</b>  |
| <b>Figure S7.</b> The LUMOs of $O_2$ and $CO$ molecules and the HOMOs of $(WC)_n$ and $Pt_n$ species.....                                                                   | <b>S10</b> |
| <b>Figure S8.</b> The HOMOs of $O_2$ and $CO$ molecules and the LUMOs of $(WC)_n$ and $Pt_n$ species.....                                                                   | <b>S11</b> |
| <b>Figure S9.</b> Reaction pathway profiles of $CO$ oxidation on $Pt$ atom.....                                                                                             | <b>S12</b> |
| <b>Figure S10.</b> Reaction pathway profiles of $CO$ oxidation on $Pt_2$ cluster.....                                                                                       | <b>S13</b> |
| <b>Figure S11.</b> Reaction pathway profiles of $CO$ oxidation on $Pt_4$ cluster.....                                                                                       | <b>S14</b> |
| <b>Figure S12.</b> Reaction pathway profiles of $CO$ oxidation on $Pt_6$ cluster.....                                                                                       | <b>S15</b> |
| <b>Figure S13.</b> Absorption spectra of <b>IM4</b> , <b>IM6</b> , and <b>IM8</b> intermediates.....                                                                        | <b>S16</b> |
| <b>Figure S14.</b> Absorption spectra of $(WC)_n$ and $Pt_n$ .....                                                                                                          | <b>S17</b> |
| <b>Figure S15.</b> The evolution of NPA charges on $(WC)_4$ and $Pt_4$ units during the catalytic $CO$ oxidation reaction.....                                              | <b>S18</b> |
| <b>Figure S16.</b> The evolution of NPA charges on $(WC)_4$ unit, $W1$ , $W2$ , $C5$ , $C6$ , and $O9$ atoms during the $CO$ oxidation reaction catalyzed by $(WC)_4$ ..... | <b>S19</b> |
| <b>Figure S17.</b> The evolution of NPA charges on $Pt_4$ unit, $Pt1$ , $Pt2$ , $Pt3$ , $Pt4$ , and $O5$ atoms during the $CO$ oxidation reaction catalyzed by $Pt_4$ ..... | <b>S20</b> |
| <b>Figure S18.</b> The mechanism diagram of $CO$ oxidation on the complex which the $(WC)_4$ adsorbs two $O_2$ molecules before $CO$ approaching.....                       | <b>S21</b> |

|                                                                                     |            |
|-------------------------------------------------------------------------------------|------------|
| <b>Figure S19.</b> TLH mechanism diagram of CO oxidation on WC.....                 | <b>S22</b> |
| <b>Figure S20.</b> TLH mechanism diagram of CO oxidation on (WC) <sub>2</sub> ..... | <b>S23</b> |
| <b>Figure S21.</b> TLH mechanism diagram of CO oxidation on (WC) <sub>4</sub> ..... | <b>S24</b> |
| <b>Figure S22.</b> TLH mechanism diagram of CO oxidation on (WC) <sub>6</sub> ..... | <b>S25</b> |
| <b>2. Cartesian coordinates.....</b>                                                | <b>S26</b> |

## 1. Figures

**Figure S1.** The optimized structures of  $(WC)_n$  and  $Pt_n$  ( $n = 1, 2, 4,$  and  $6$ ) with spin multiplicities (denoted as a superscript) and symmetric group points (in the brackets).

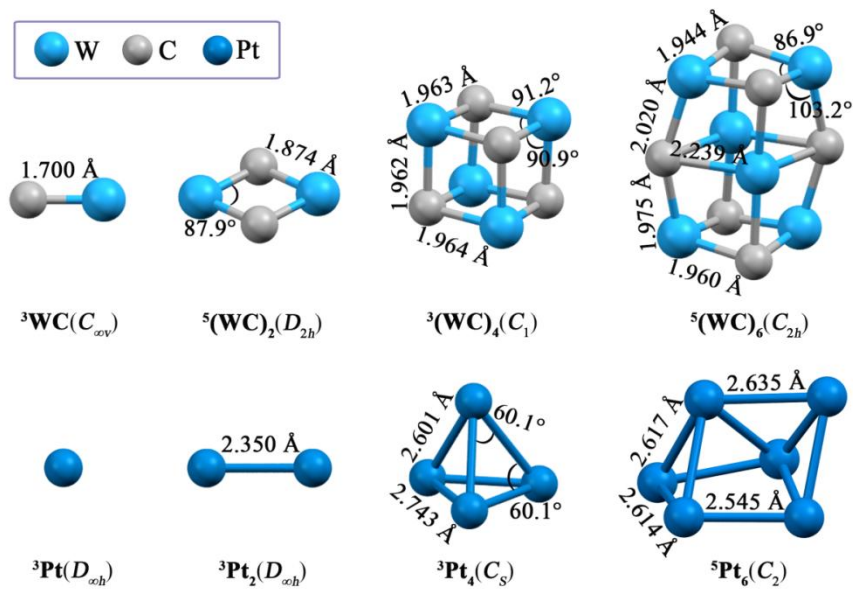

**Figure S2.** The evolution of VIE, VEA,  $\eta$ , and  $\omega$  values with the increasing size of (a)  $(WC)_n$  and (b)  $Pt_n$  species.

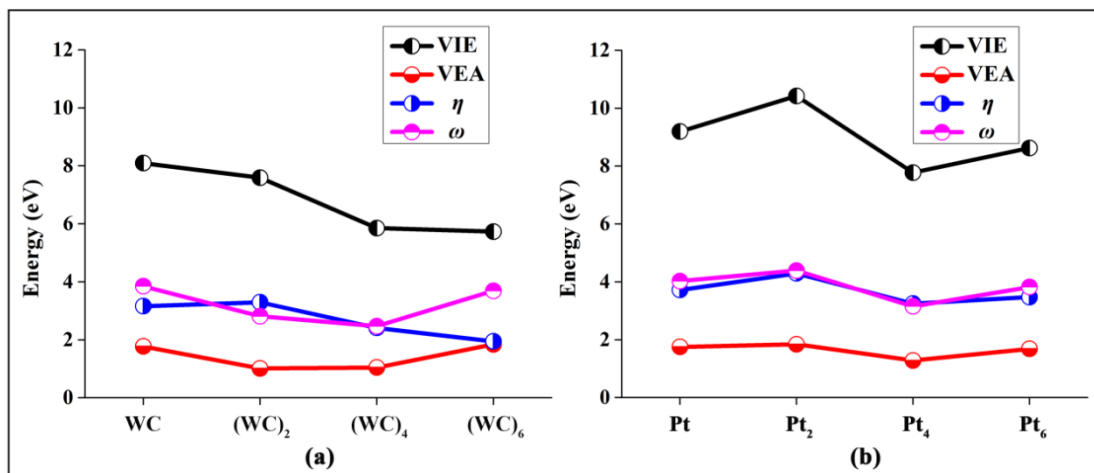

**Figure S3.** The ESP diagrams of  $(WC)_n$  and  $Pt_n$  species. The cyan and yellow balls represent the minimum and maximum points of electrostatic potential, respectively.

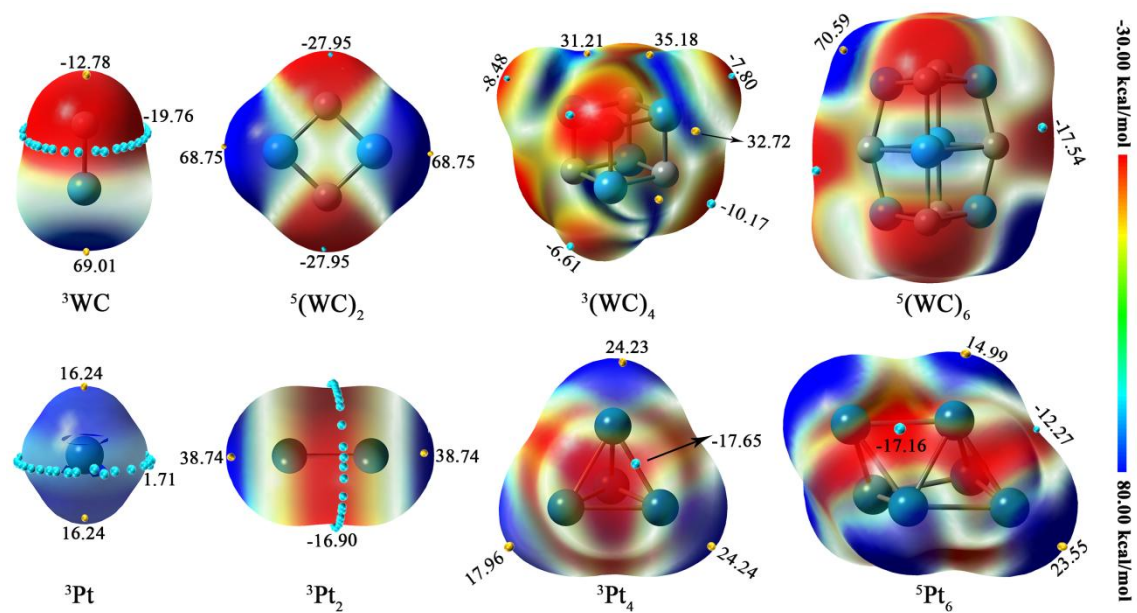

**Figure S4.** Electron spin density diagrams of  $(WC)_n$  and  $Pt_n$  species with an isosurface of 0.005 a.u., where the corresponding  $\alpha$  and  $\beta$  populations are donated as blue and red color, respectively.

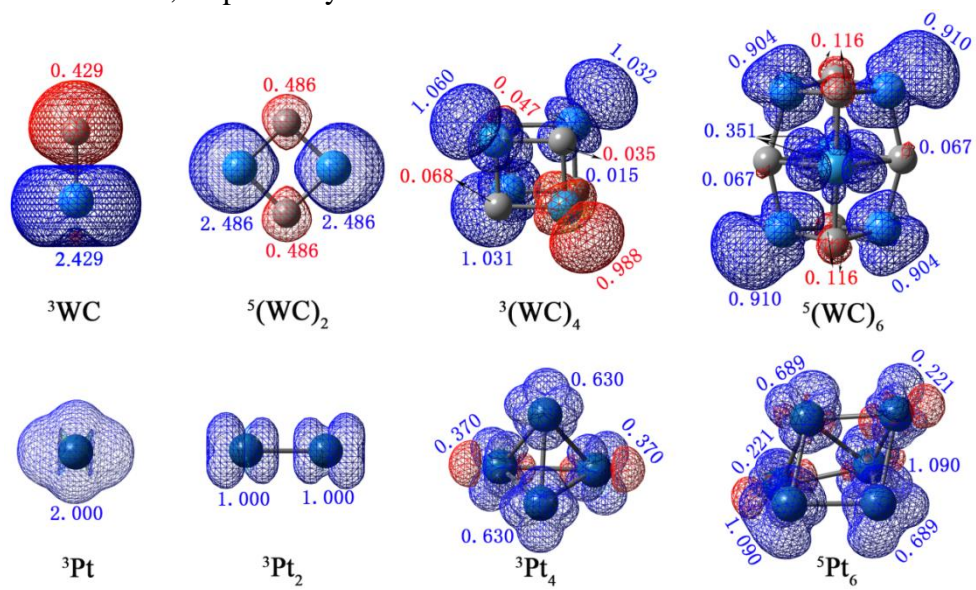

**Figure S5.** Low-lying isomers of  $X_n\text{-O}_2$  complexes with relative energy ( $E_{\text{rel}}$ ), critical bond lengths and spin multiplicity. The low-lying isomers are named as **A, B, C, D ...** for  $(\text{WC})_n$  and **a, b, c, d ...** for  $\text{Pt}_n$ , respectively.

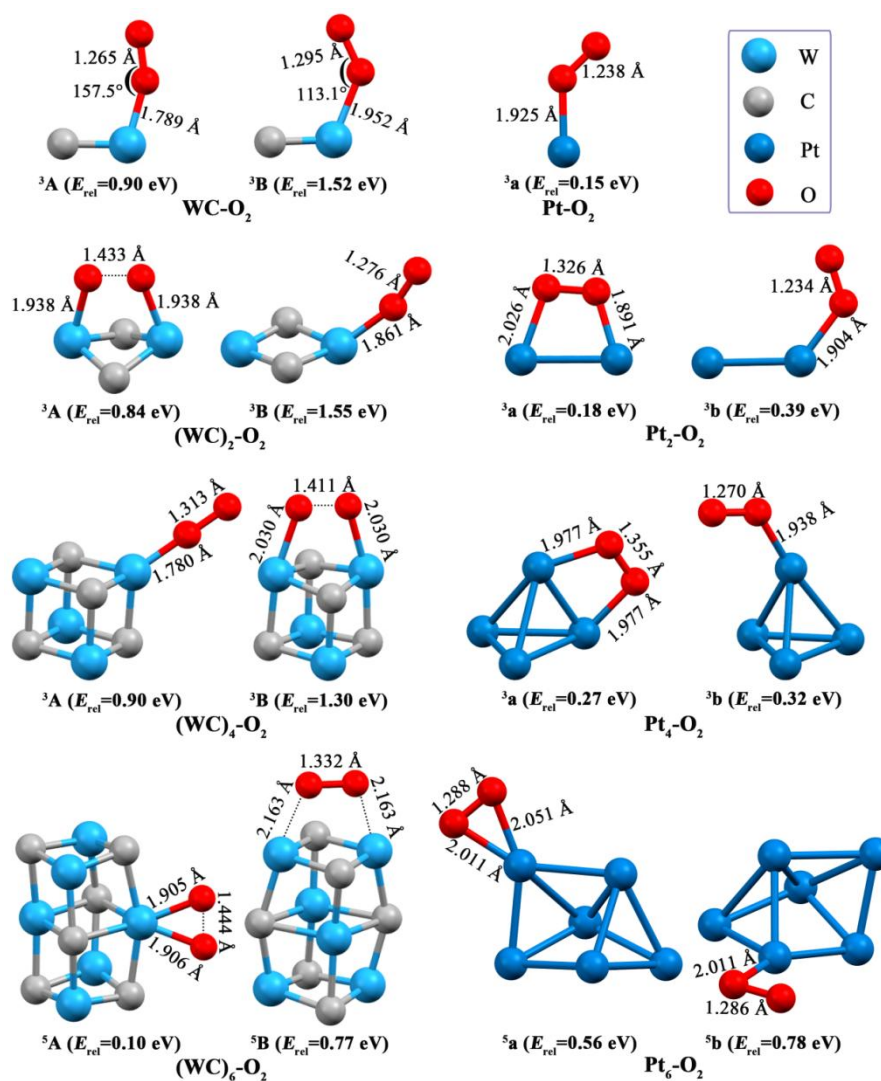



**Figure S6.** Low-lying isomers of  $X_n$ -CO complexes with relative energy ( $E_{\text{rel}}$ ), critical bond lengths and spin multiplicity. The low-lying isomers of  $X_n$ -O<sub>2</sub> and  $X_n$ -CO were named as **A, B, C, D ...** for  $(\text{WC})_n$  and **a, b, c, d ...** for  $\text{Pt}_n$ , respectively.

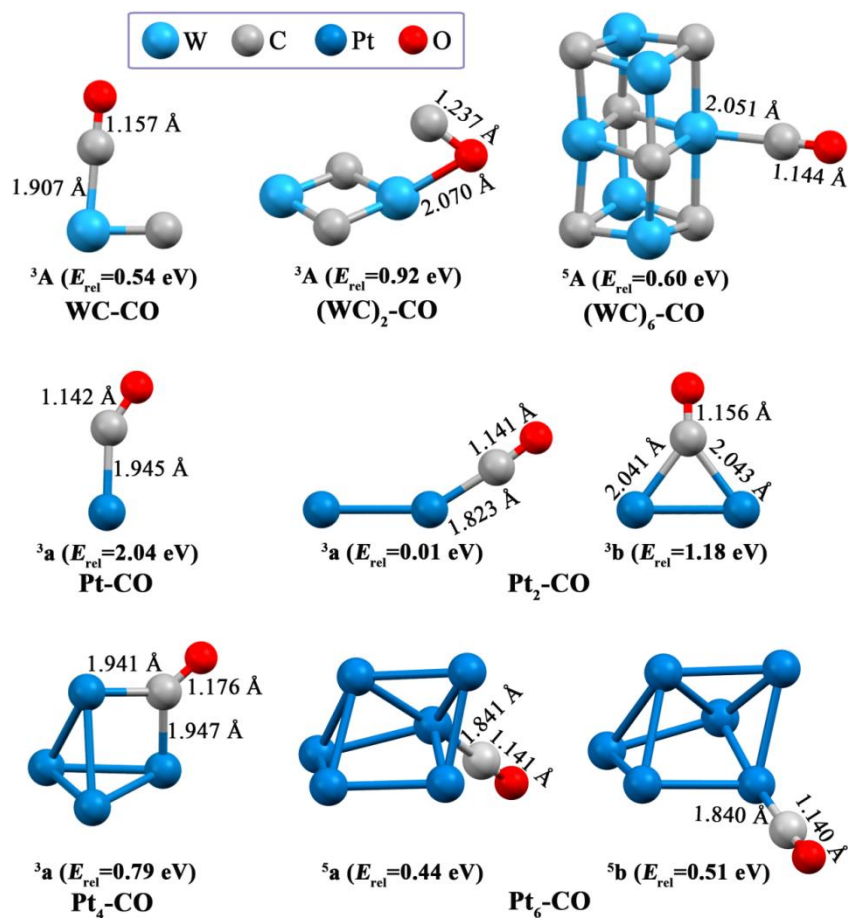

**Figure S7.** The LUMOs of  $O_2$  and  $CO$  molecules and the HOMOs of  $(WC)_n$  and  $Pt_n$ .

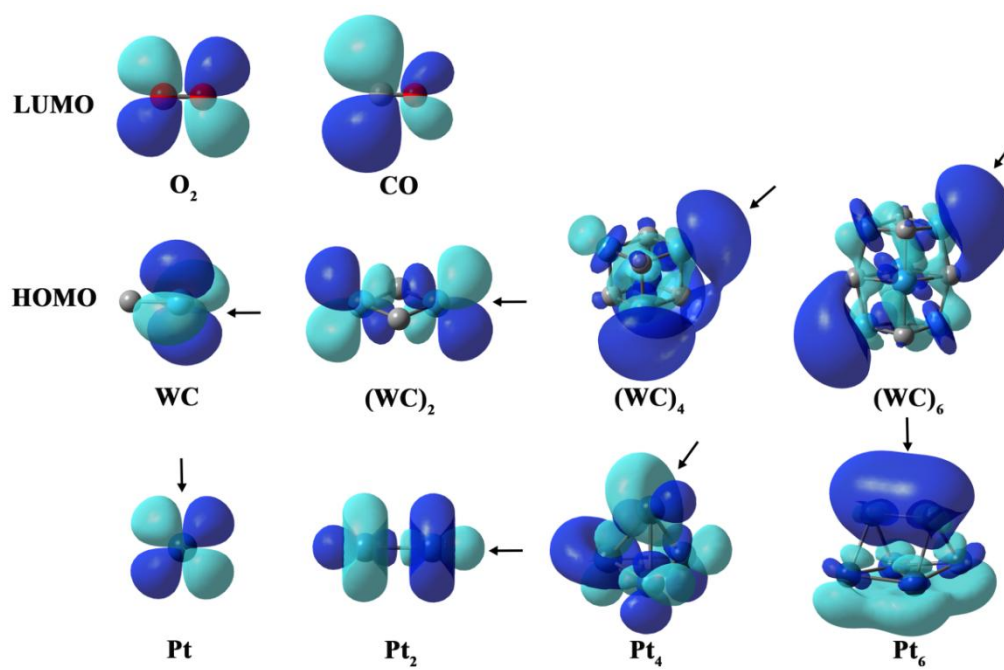

**Figure S8.** The HOMOs of O<sub>2</sub> and CO molecules and the LUMOs of (WC)<sub>n</sub> and Pt<sub>n</sub>.

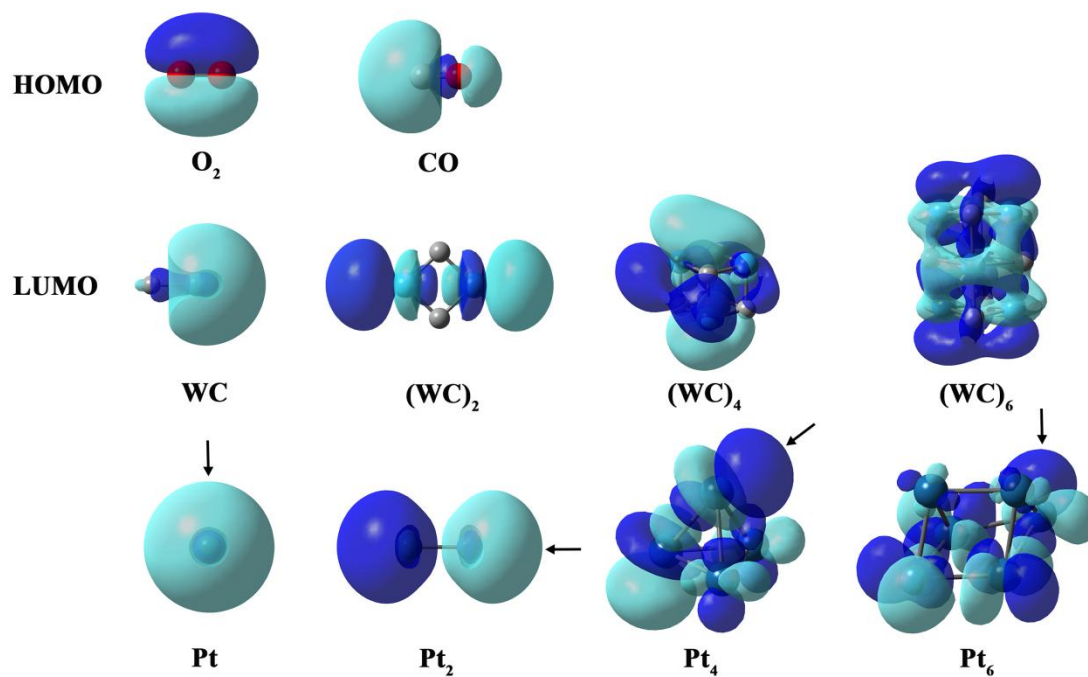

**Figure S9.** Reaction pathway profiles of CO oxidation on Pt atom. All the free energies are given respect to the sum of free energies of Pt, two CO, and one O<sub>2</sub> molecules.

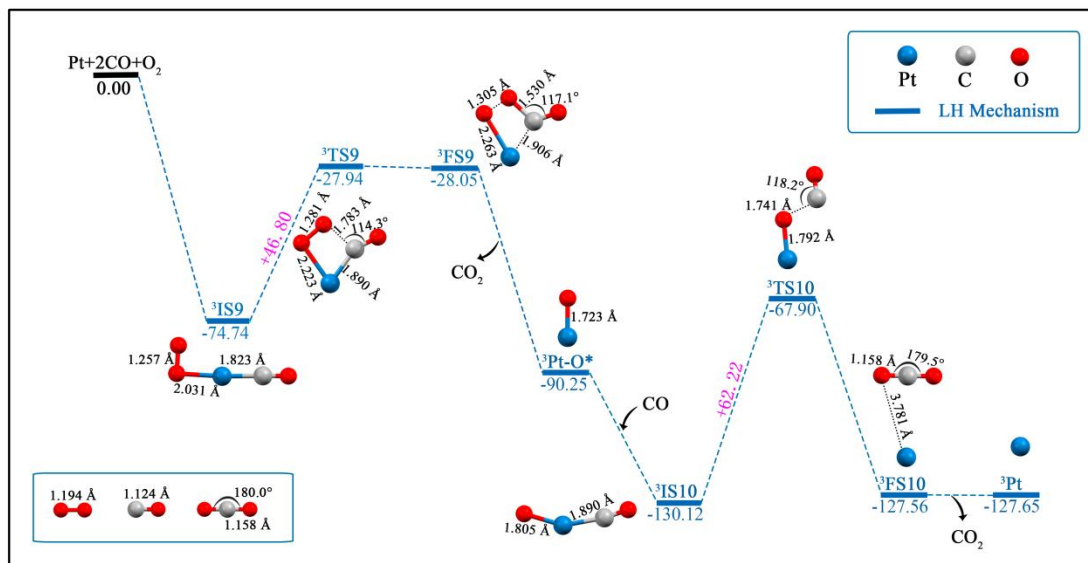

**Figure S10.** Reaction pathway profiles of CO oxidation on Pt<sub>2</sub> cluster. All the free energies are given respect to the sum of free energies of Pt<sub>2</sub>, two CO, and one O<sub>2</sub> molecules.

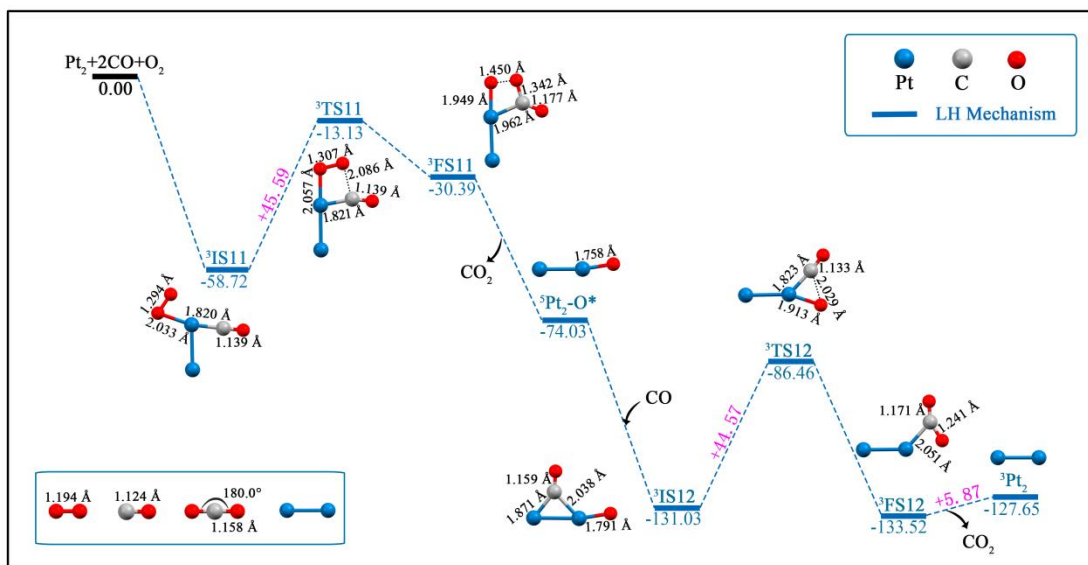

**Figure S11.** Reaction pathway profiles of CO oxidation on Pt<sub>4</sub> cluster. All the free energies are given respect to the sum of free energies of Pt<sub>4</sub>, two CO, and one O<sub>2</sub> molecules.

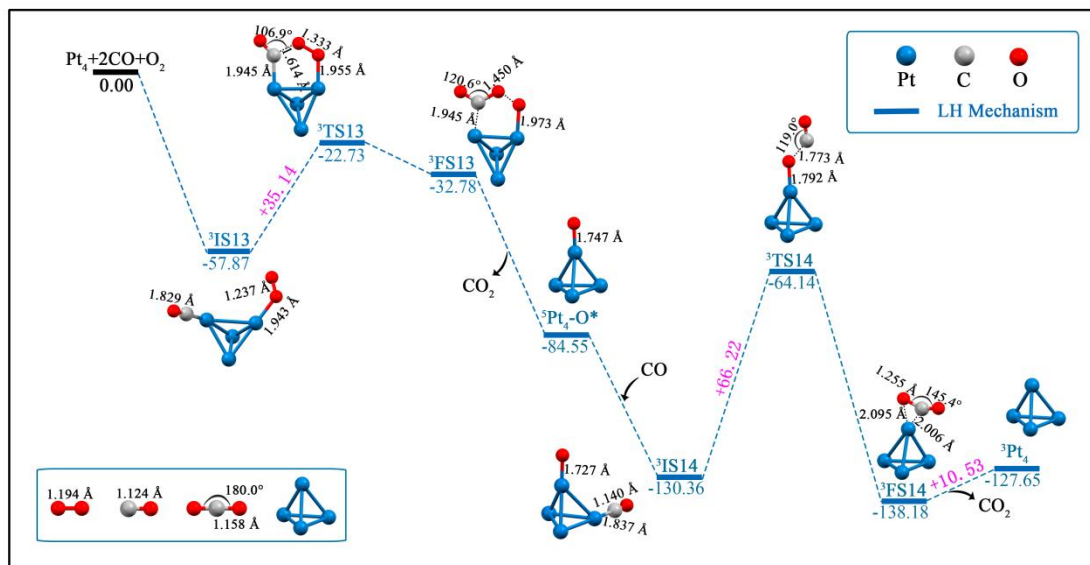

**Figure S12.** Reaction pathway profiles of CO oxidation on Pt<sub>6</sub> cluster. All the free energies are given respect to the sum of free energies of Pt<sub>6</sub>, two CO, and one O<sub>2</sub> molecules.

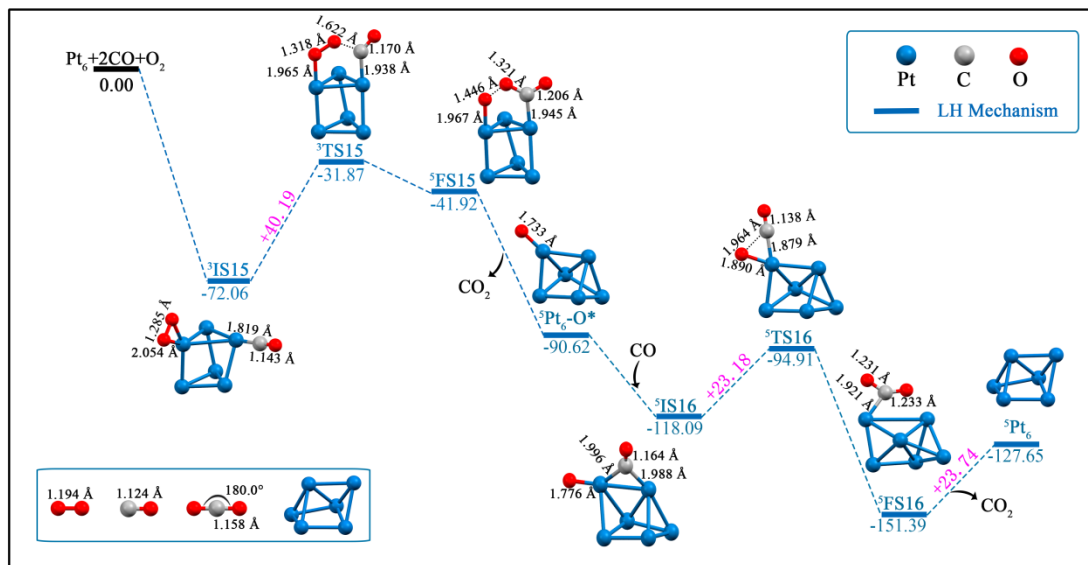

**Figure S13.** Absorption spectra of **IM4**, **IM6**, and **IM8** intermediates.

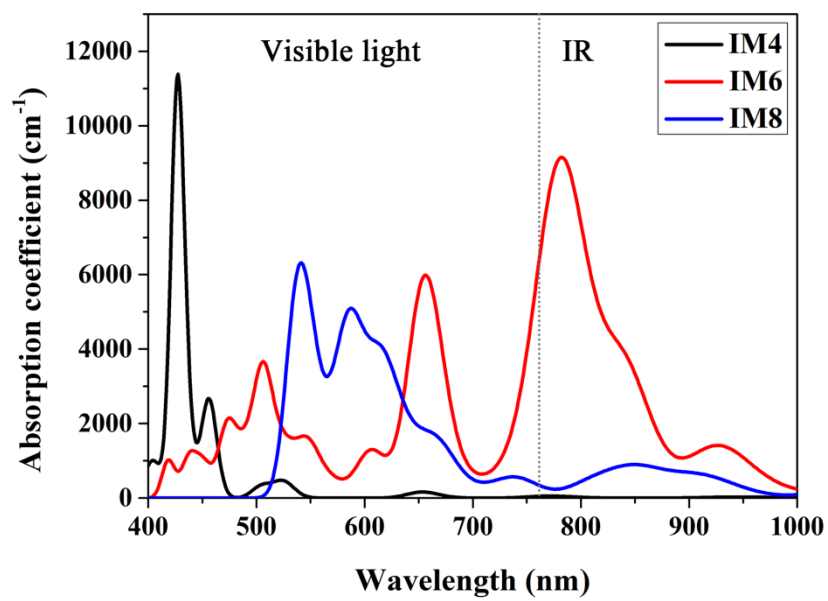



**Figure S14.** Absorption spectra of (a) Pt atom and WC superatom, (b) Pt<sub>2</sub> and (WC)<sub>2</sub> clusters, (c) Pt<sub>4</sub> and (WC)<sub>4</sub> clusters, (d) Pt<sub>6</sub> and (WC)<sub>6</sub> clusters.

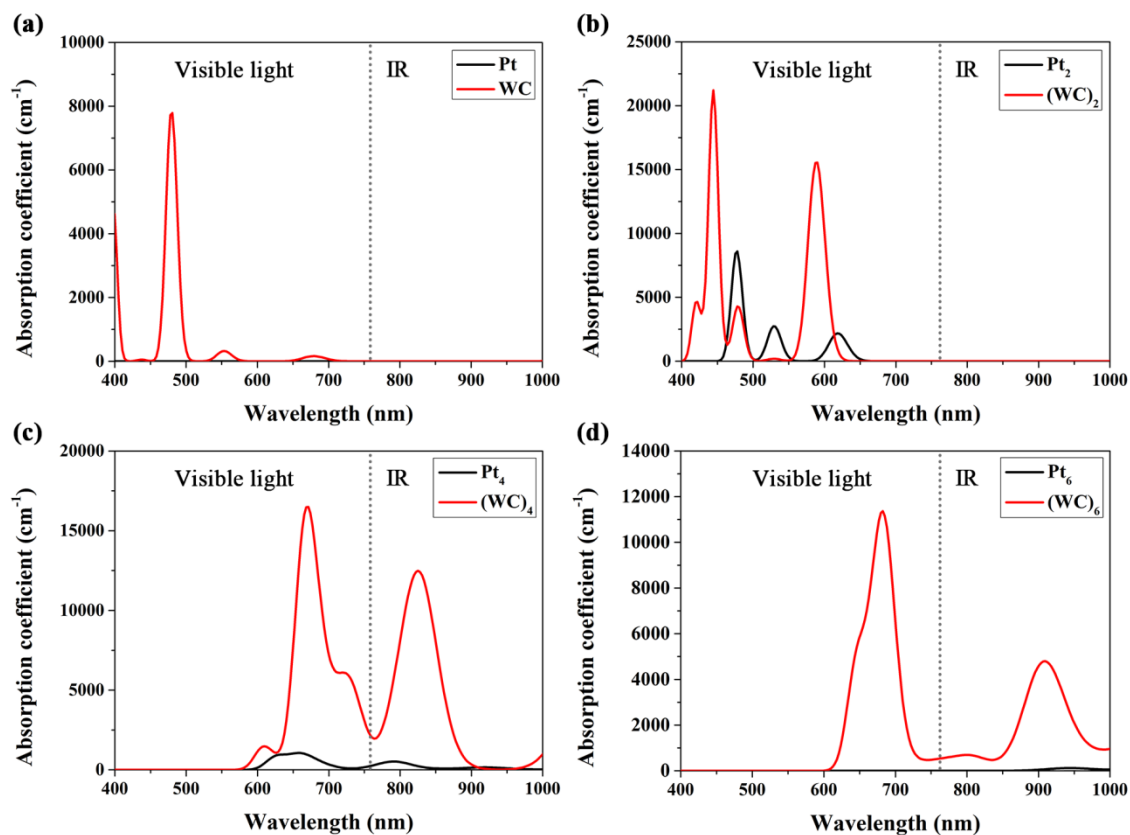

**Figure S15.** The evolution of NPA charges (in  $|e|$ ) on the  $(WC)_4$  and  $Pt_4$  units during the catalytic CO oxidation reaction.

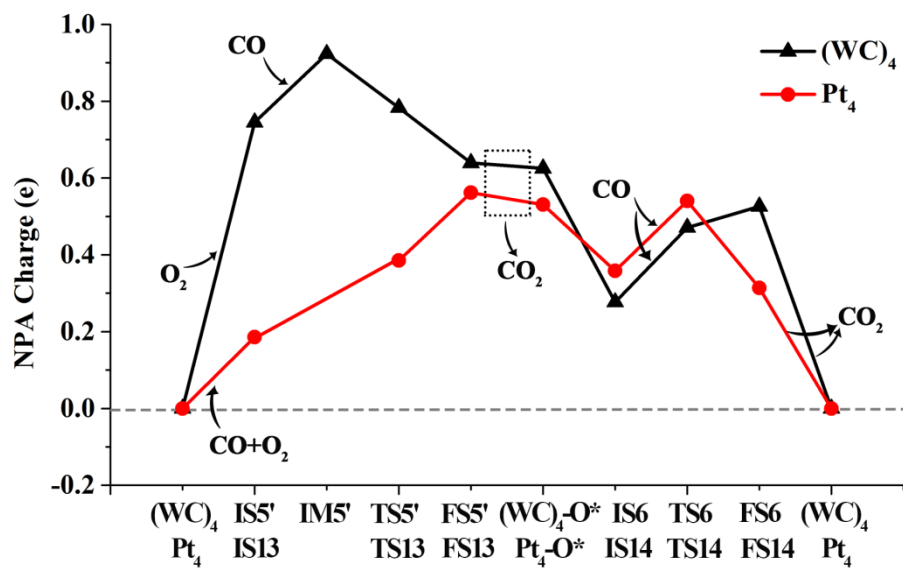

**Figure S16.** The evolution of NPA charges on the  $(WC)_4$  unit, W1, W2, C5, C6, and O9 atoms during the CO oxidation reaction catalyzed by  $(WC)_4$ .

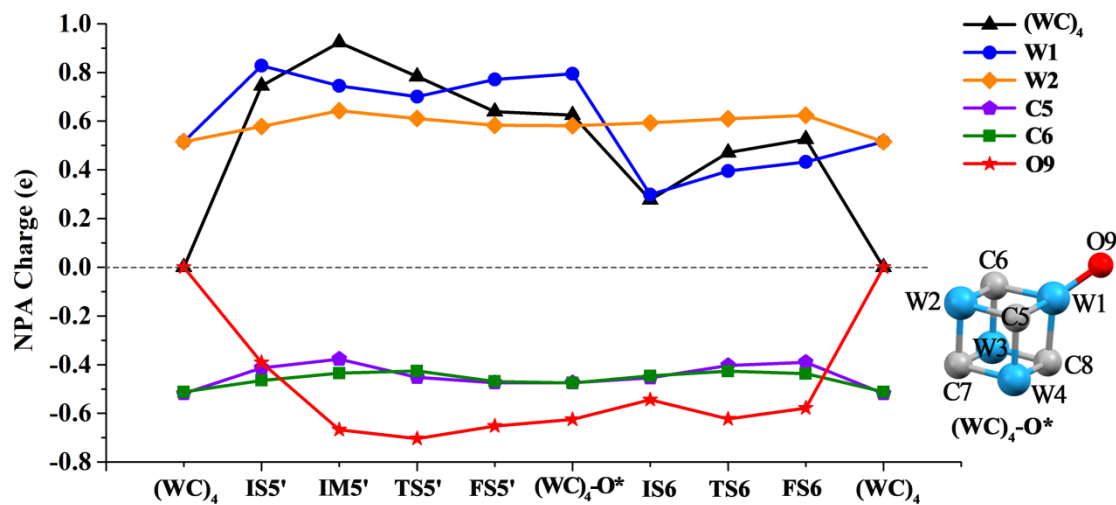

**Figure S17.** The evolution of NPA charges on Pt<sub>4</sub> unit, Pt1, Pt2, Pt3, Pt4, and O5 atoms in the CO oxidation reaction catalyzed by Pt<sub>4</sub>.

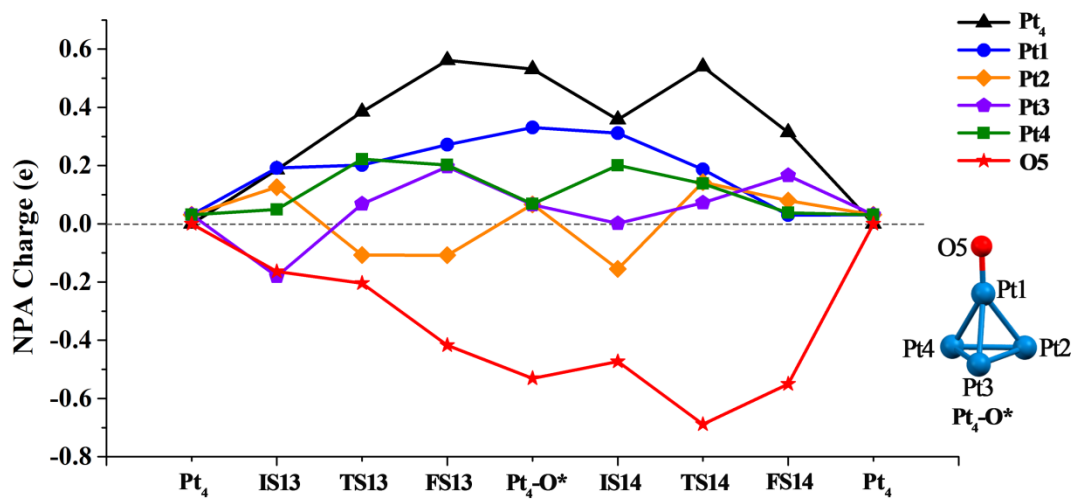

**Figure S18.** The mechanism diagram of CO oxidation on the complex which the  $(WC)_4$  adsorbs two  $O_2$  molecules before CO approaching. All free energies are given respect to the sum of free energies of  $(WC)_4$ , four CO, and two  $O_2$  molecules. The transition states are marked by an asterisk (\*) symbol.

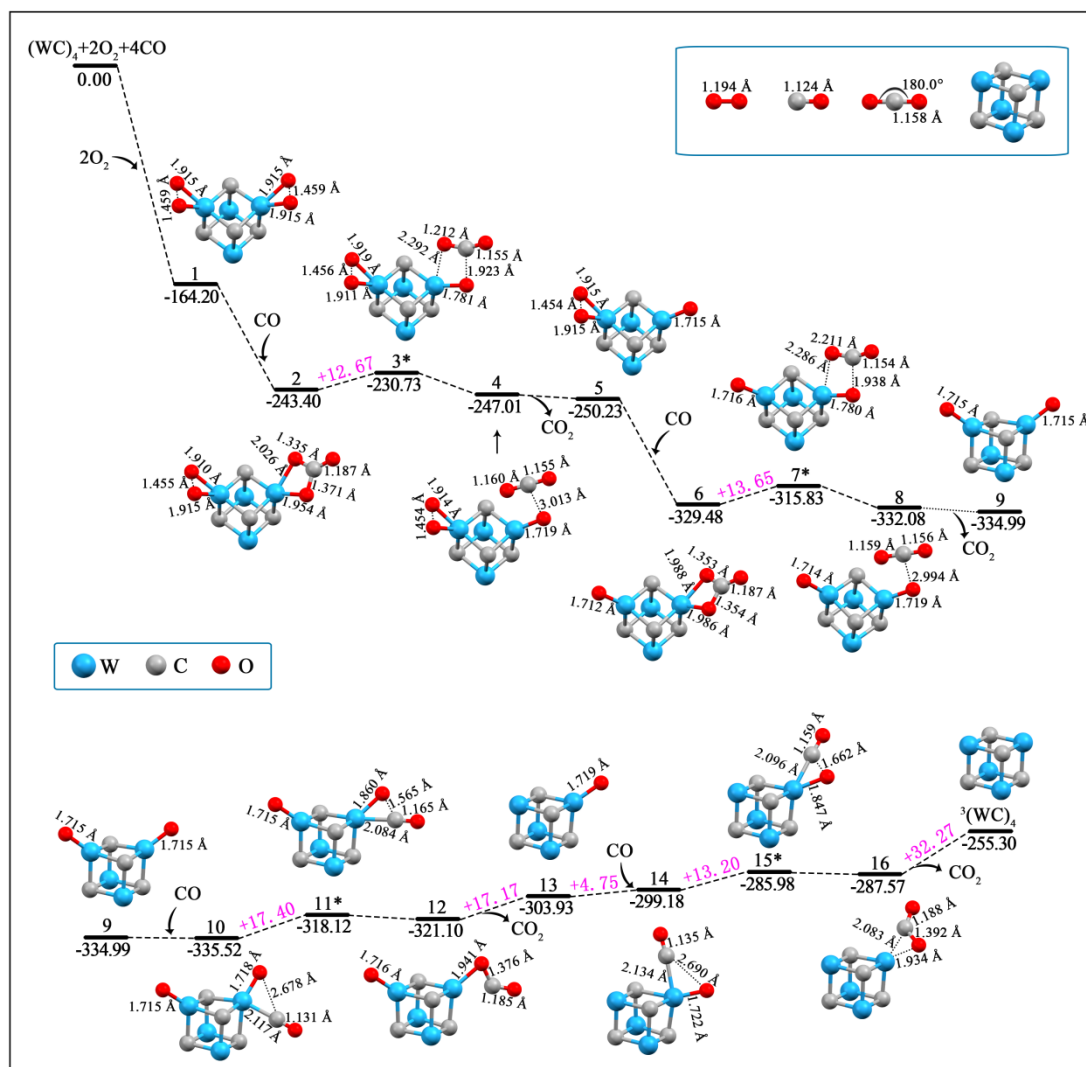

**Figure S19.** The TLH mechanism diagram of CO oxidation on the WC superatom. All free energies are given respect to the sum of free energies of WC, two CO, and one O<sub>2</sub> molecules.

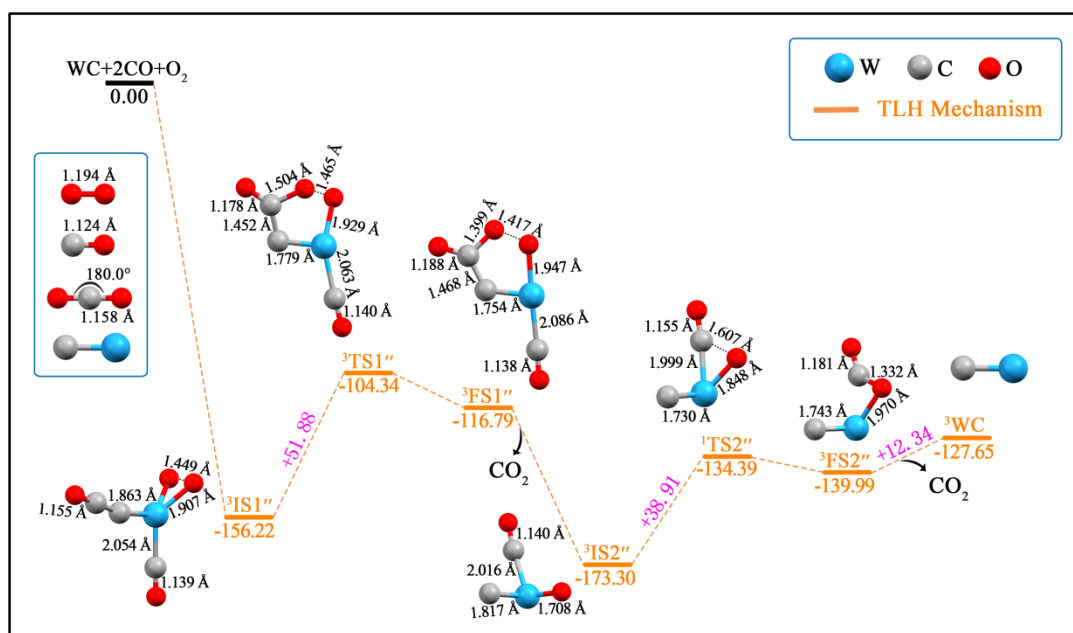

**Figure S20.** The TLH mechanism diagram of CO oxidation on the  $(WC)_2$  cluster. All free energies are given respect to the sum of free energies of  $(WC)_2$ , two CO, and one  $O_2$  molecules.

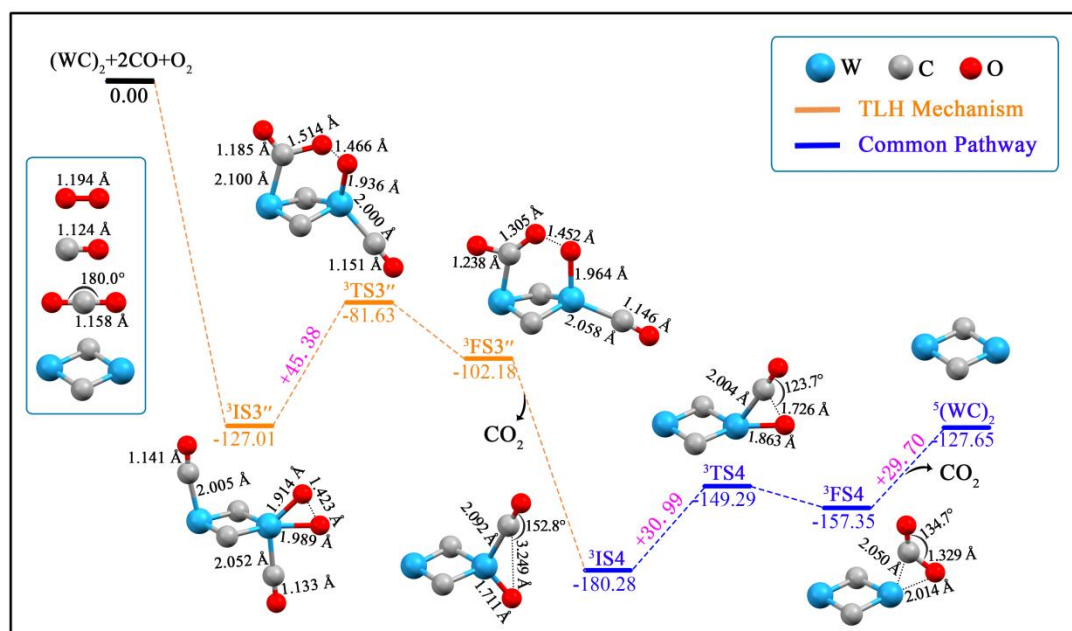

**Figure S21.** The TLH mechanism diagram of CO oxidation on the  $(WC)_4$  cluster. All free energies are given respect to the sum of free energies of  $(WC)_4$ , two CO, and one  $O_2$  molecules.

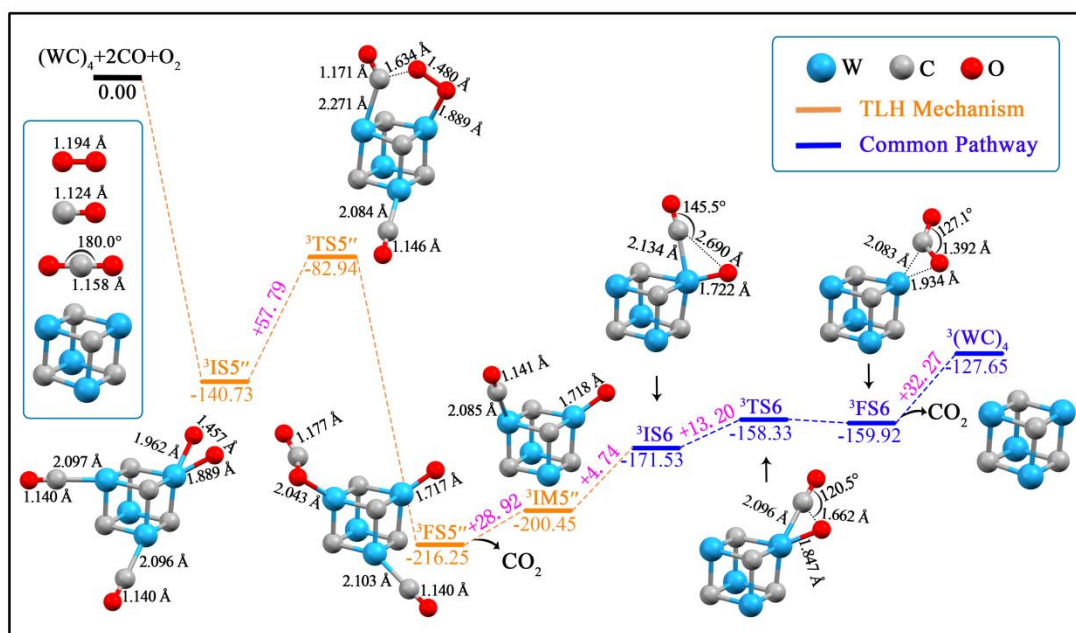



**Figure S22.** The TLH mechanism diagram of CO oxidation on the  $(\text{WC})_6$  cluster. All free energies are given respect to the sum of free energies of  $(\text{WC})_6$ , two CO, and one  $\text{O}_2$  molecules.

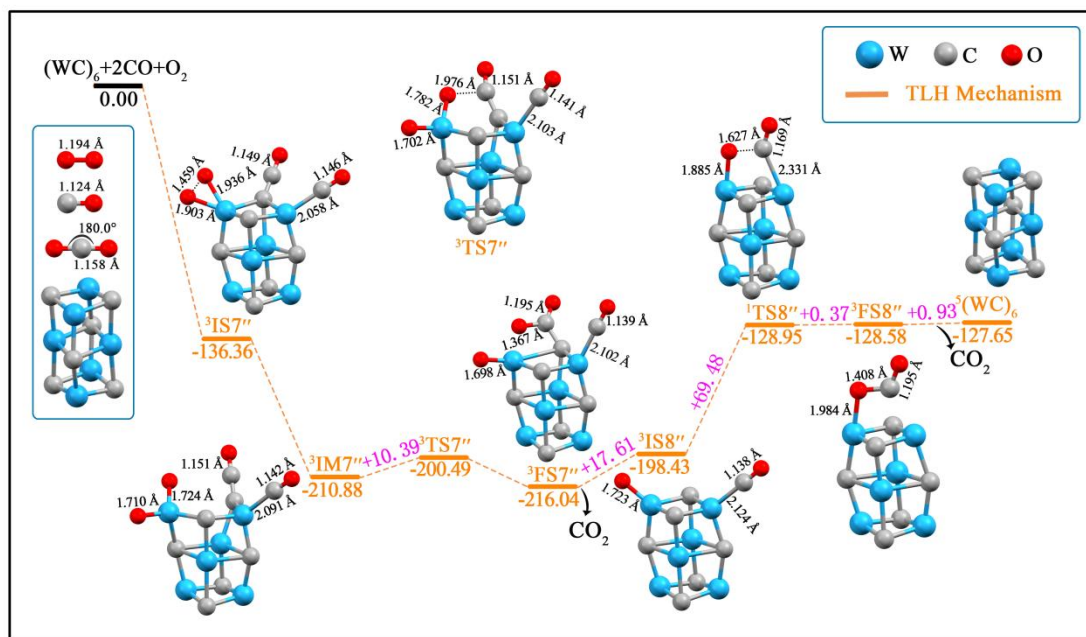

### 3. Cartesian Coordinates

(1)  $(WC)_n$  and  $Pt_n$  ( $n = 1, 2, 4,$  and  $6$ ) species

#### WC

|   |            |            |             |
|---|------------|------------|-------------|
| W | 0.00000000 | 0.00000000 | 0.12751900  |
| C | 0.00000000 | 0.00000000 | -1.57273500 |

#### $(WC)_2$

|   |            |             |             |
|---|------------|-------------|-------------|
| W | 0.00000000 | 0.00000000  | 1.34862800  |
| W | 0.00000000 | 0.00000000  | -1.34862800 |
| C | 0.00000000 | 1.30101800  | 0.00000000  |
| C | 0.00000000 | -1.30101800 | 0.00000000  |

#### $(WC)_4$

|   |             |             |             |
|---|-------------|-------------|-------------|
| W | -0.57997000 | -0.75030100 | -1.42672200 |
| W | 1.72108100  | -0.03125100 | 0.00924200  |
| C | 0.53397700  | -1.59552900 | -0.04996000 |
| C | 0.58456700  | 0.82729700  | -1.34419500 |
| W | -0.59670300 | -0.84235400 | 1.36730700  |
| W | -0.54422100 | 1.62386600  | 0.05016000  |
| C | 0.56747900  | 0.73722100  | 1.40270200  |
| C | -1.68833300 | 0.03150700  | -0.00836700 |

#### $(WC)_6$

|   |             |             |             |
|---|-------------|-------------|-------------|
| W | -1.38476700 | 1.89679500  | 0.00000000  |
| W | 0.00000000  | 0.00000000  | 1.22726900  |
| C | -1.87177100 | -0.06317700 | 0.00000000  |
| C | 0.00000000  | 2.11035800  | 1.34768400  |
| W | 1.41717800  | 1.98557100  | 0.00000000  |
| W | 0.00000000  | 0.00000000  | -1.22726900 |
| C | 0.00000000  | 2.11035800  | -1.34768400 |
| C | 1.87177100  | 0.06317700  | 0.00000000  |
| W | -1.41717800 | -1.98557100 | 0.00000000  |
| W | 1.38476700  | -1.89679500 | 0.00000000  |
| C | 0.00000000  | -2.11035800 | -1.34768400 |
| C | 0.00000000  | -2.11035800 | 1.34768400  |

#### $Pt_2$

|    |            |            |             |
|----|------------|------------|-------------|
| Pt | 0.00000000 | 0.00000000 | 1.17506500  |
| Pt | 0.00000000 | 0.00000000 | -1.17506500 |

#### $Pt_4$

|    |            |             |             |
|----|------------|-------------|-------------|
| Pt | 0.52478900 | -0.72581200 | 1.37158700  |
| Pt | 0.52478900 | -0.72581200 | -1.37158700 |

|    |             |             |            |
|----|-------------|-------------|------------|
| Pt | 0.52478900  | 1.48489300  | 0.00000000 |
| Pt | -1.57436700 | -0.03327000 | 0.00000000 |

**Pt<sub>6</sub>**

|    |             |             |             |
|----|-------------|-------------|-------------|
| Pt | -1.15669200 | -0.53057400 | 1.50781300  |
| Pt | -1.15669200 | 0.55054800  | -0.89228200 |
| Pt | 1.15669200  | 0.53057400  | 1.50781300  |
| Pt | 0.99537100  | 2.04647500  | -0.61553100 |
| Pt | -0.99537100 | -2.04647500 | -0.61553100 |
| Pt | 1.15669200  | -0.55054800 | -0.89228200 |

(2) X<sub>n</sub>-O<sub>2</sub> and X<sub>n</sub>-CO (X = WC and Pt, n = 1, 2, 4, and 6) structures

**WC-O<sub>2</sub>**

|   |             |             |             |
|---|-------------|-------------|-------------|
| W | 0.22246500  | -0.16208200 | -0.03106300 |
| C | 1.20302500  | 1.26690800  | 0.24774600  |
| O | -1.47320500 | 0.50062400  | -0.63447500 |
| O | -1.48686200 | 0.04844900  | 0.73599600  |

**WC-CO**

|   |             |             |             |
|---|-------------|-------------|-------------|
| W | -0.43038900 | -0.09210100 | -0.00009900 |
| C | 0.24848800  | 1.52944100  | 0.00001700  |
| C | 1.51169700  | -0.15507600 | 0.00324000  |
| O | 2.66095600  | -0.17883700 | -0.00152900 |

**(WC)<sub>2</sub>-O<sub>2</sub>**

|   |             |             |             |
|---|-------------|-------------|-------------|
| W | 1.06625200  | -0.00005500 | 0.00093800  |
| W | -1.62397300 | 0.00002500  | -0.00029200 |
| C | -0.36978200 | -1.31680600 | -0.00015500 |
| C | -0.36967500 | 1.31679300  | -0.00009700 |
| O | 2.85477000  | 0.00018100  | -0.71079900 |
| O | 2.85874900  | 0.00010100  | 0.70501200  |

**(WC)<sub>2</sub>-CO**

|   |             |             |             |
|---|-------------|-------------|-------------|
| W | -1.52231100 | 0.20983500  | 0.00003500  |
| W | 1.06041300  | -0.48311700 | -0.00006900 |
| C | -0.27435900 | -0.15423300 | 1.30812800  |
| C | -0.27438600 | -0.15298100 | -1.30818700 |
| C | 2.34777500  | 1.00279200  | -0.00016600 |
| O | 2.92328000  | 2.00617600  | 0.00048400  |

**(WC)<sub>4</sub>-O<sub>2</sub>**

|   |             |             |             |
|---|-------------|-------------|-------------|
| W | -0.83480300 | 1.50593000  | -0.46533000 |
| W | -0.69502900 | -1.22868300 | -1.06019200 |
| C | -1.89742900 | -0.09269300 | -0.00375700 |

|   |             |             |             |
|---|-------------|-------------|-------------|
| C | 0.35088900  | 0.36914100  | -1.53651500 |
| W | -0.75165300 | -0.36829800 | 1.52706200  |
| W | 1.61487300  | 0.11405400  | -0.01843200 |
| C | 0.42273200  | -1.49885100 | 0.49224700  |
| C | 0.33379300  | 1.20197300  | 1.06497000  |
| O | 3.32334600  | -0.79132300 | 0.29778000  |
| O | 3.43532000  | 0.59387300  | -0.15423500 |

**(WC)<sub>4</sub>-CO**

|   |             |             |             |
|---|-------------|-------------|-------------|
| W | 0.90485100  | -0.67931500 | 1.39621600  |
| W | -1.53045500 | -0.29181100 | 0.00372200  |
| C | -0.05115500 | -1.67542600 | 0.01642300  |
| C | -0.49893700 | 0.70112500  | 1.37860000  |
| W | 0.90317500  | -0.70638100 | -1.38359800 |
| W | 0.45599100  | 1.68625900  | -0.01646900 |
| C | -0.50064800 | 0.67421600  | -1.39112200 |
| C | 1.84729400  | 0.31272000  | -0.00403600 |
| C | -3.55808800 | -0.07466000 | 0.00109400  |
| O | -4.71429600 | -0.03442900 | 0.00047700  |

**(WC)<sub>6</sub>-O<sub>2</sub>**

|   |             |             |             |
|---|-------------|-------------|-------------|
| W | 2.22201100  | -0.91293000 | 0.00351200  |
| W | -0.11529000 | 0.07129900  | -1.27125700 |
| C | 0.23567500  | -1.53004300 | 0.00566600  |
| C | 1.89983500  | 0.51428200  | -1.36461400 |
| W | 1.44148500  | 1.84259600  | -0.01077400 |
| W | -0.13658200 | 0.15680700  | 1.26181000  |
| C | 1.90339900  | 0.48563400  | 1.34361800  |
| C | -0.55621000 | 1.91751200  | 0.01323300  |
| W | -1.78047000 | -1.73396100 | 0.00527500  |
| W | -2.32452900 | 0.99276100  | -0.00586400 |
| C | -2.16861200 | -0.41782300 | 1.36313300  |
| C | -2.15010200 | -0.44840500 | -1.36921200 |
| O | 3.06868000  | -2.61036800 | 0.38653800  |
| O | 3.97205700  | -1.63378700 | -0.22041100 |

**(WC)<sub>6</sub>-CO**

|   |             |             |             |
|---|-------------|-------------|-------------|
| W | 2.24349400  | 0.71205600  | 0.00003700  |
| W | -0.13237700 | -0.06181600 | 1.20403800  |
| C | 0.48295800  | 1.68559000  | 0.00003800  |
| C | 1.86355500  | -0.68626100 | 1.34808300  |
| W | 1.26665100  | -1.97432600 | 0.00001600  |
| W | -0.13236400 | -0.06183400 | -1.20405100 |
| C | 1.86359600  | -0.68623700 | -1.34801600 |

|   |             |             |             |
|---|-------------|-------------|-------------|
| C | -0.73136100 | -1.85310400 | -0.00004700 |
| W | -1.56800400 | 1.82433400  | 0.00001600  |
| W | -2.45391100 | -0.83261200 | -0.00002900 |
| C | -2.17034200 | 0.57117600  | -1.33979700 |
| C | -2.17037100 | 0.57115100  | 1.33978900  |
| C | 3.93781600  | 1.87259900  | -0.00011900 |
| O | 4.87583100  | 2.54014100  | -0.00020000 |

**Pt-O<sub>2</sub>**

|    |             |             |            |
|----|-------------|-------------|------------|
| Pt | 0.00000000  | 0.37536700  | 0.00000000 |
| O  | 0.50070100  | -1.45531600 | 0.00000000 |
| O  | -0.50070100 | -2.20451400 | 0.00000000 |

**Pt-CO**

|    |            |            |             |
|----|------------|------------|-------------|
| Pt | 0.00000000 | 0.00000000 | 0.36734200  |
| C  | 0.00000000 | 0.00000000 | -1.39277500 |
| O  | 0.00000000 | 0.00000000 | -2.53700500 |

**Pt<sub>2</sub>-O<sub>2</sub>**

|    |             |             |             |
|----|-------------|-------------|-------------|
| Pt | 0.91374600  | -0.05340700 | 0.00002100  |
| Pt | -1.49002600 | 0.02005900  | -0.00000900 |
| O  | 2.69209200  | 0.78593900  | -0.00003100 |
| O  | 2.92663900  | -0.46080200 | -0.00008100 |

**Pt<sub>2</sub>-CO**

|    |             |             |             |
|----|-------------|-------------|-------------|
| Pt | 0.94668100  | -0.00003200 | 0.00032800  |
| Pt | -1.56273100 | 0.00001600  | -0.00054200 |
| C  | 2.78072100  | 0.00008300  | 0.00097500  |
| O  | 3.92094800  | 0.00009200  | 0.00135100  |

**Pt<sub>4</sub>-O<sub>2</sub>**

|    |             |             |             |
|----|-------------|-------------|-------------|
| Pt | 0.54055400  | -1.27806300 | 0.79890600  |
| Pt | -1.51140000 | 0.00003500  | -0.09106100 |
| Pt | 1.11017400  | 0.00007000  | -1.35512300 |
| Pt | 0.54058100  | 1.27795700  | 0.79903300  |
| O  | -3.31456300 | 0.64250900  | -0.73965200 |
| O  | -3.31454100 | -0.64250700 | -0.73995300 |

**Pt<sub>4</sub>-CO**

|    |             |             |             |
|----|-------------|-------------|-------------|
| Pt | 1.00134900  | -1.35746100 | 0.16409000  |
| Pt | 1.00418900  | 0.88788600  | -1.04185500 |
| Pt | 0.11527400  | 0.74010500  | 1.37279600  |
| Pt | -1.42862300 | -0.26938000 | -0.48361500 |
| C  | -3.22088600 | -0.08710900 | -0.19527300 |

|   |             |            |            |
|---|-------------|------------|------------|
| O | -4.33317400 | 0.05411700 | 0.03515500 |
|---|-------------|------------|------------|

### **Pt<sub>6</sub>-O<sub>2</sub>**

|    |             |             |             |
|----|-------------|-------------|-------------|
| Pt | -0.87098100 | 0.96853200  | -1.27967900 |
| Pt | -0.15932500 | -1.44219000 | -0.54495200 |
| Pt | 1.20018100  | 1.78213500  | 0.08208800  |
| Pt | 2.13441200  | -0.60274300 | -0.07464200 |
| Pt | -2.44741100 | -0.28690300 | 0.32094400  |
| Pt | -0.19407600 | 0.15300200  | 1.53749100  |
| O  | 1.02273600  | -3.01486000 | -0.28803400 |
| O  | 2.26496300  | -2.56050100 | -0.11415800 |

### **Pt<sub>6</sub>-CO**

|    |             |             |             |
|----|-------------|-------------|-------------|
| Pt | -0.58417500 | 0.46251400  | -1.52736000 |
| Pt | -0.12644200 | -1.57793000 | 0.00058700  |
| Pt | 0.91691800  | 1.88457400  | -0.00013300 |
| Pt | 2.22017700  | -0.38327600 | 0.00006700  |
| Pt | -2.49909200 | -0.42260700 | -0.00033800 |
| Pt | -0.58507900 | 0.46349200  | 1.52707700  |
| C  | 3.27394000  | -1.85358400 | -0.00034200 |
| O  | 3.95706500  | -2.77078900 | 0.00123800  |

### (3) Transition states involved in the CO oxidation mechanism

#### **TS1**

|   |             |             |             |
|---|-------------|-------------|-------------|
| O | 0.58853900  | 2.08175300  | -0.40496400 |
| O | -0.39307200 | 1.54977800  | 0.45845600  |
| C | 2.21706000  | 1.06153000  | 0.03693200  |
| O | 3.13523700  | 1.77592400  | 0.04285000  |
| W | -0.16110500 | -0.16326600 | -0.25702600 |
| C | 1.62637600  | -0.19670600 | 0.06433100  |

#### **TS1'**

|   |             |             |             |
|---|-------------|-------------|-------------|
| W | -0.13854000 | -0.13054500 | -0.05975100 |
| C | 1.04186900  | 1.27557200  | 0.03952700  |
| O | -1.27137700 | 0.20185600  | -1.46636800 |
| O | -1.02683800 | -0.04398900 | 1.40921400  |
| C | -1.60639600 | 1.62367000  | -2.36913900 |
| O | -2.32513900 | 1.53627700  | -3.26461700 |

#### **TS1''**

|   |             |            |             |
|---|-------------|------------|-------------|
| O | 0.79896400  | 1.98644700 | -0.33604000 |
| O | -0.31590200 | 1.65425000 | 0.55427700  |
| C | 2.03673900  | 1.14976500 | -0.01466300 |
| O | 3.06995200  | 1.72170200 | 0.04371700  |

|   |             |             |             |
|---|-------------|-------------|-------------|
| W | -0.21877300 | -0.11892100 | -0.27941800 |
| C | 1.55249100  | -0.22112200 | -0.03364600 |
| C | -0.94725900 | -2.04236400 | -0.52514900 |
| O | -1.39210300 | -3.10241500 | -0.54763300 |

**TS2**

|   |             |             |             |
|---|-------------|-------------|-------------|
| W | 0.05062100  | 0.33937100  | 0.04534600  |
| C | 0.90928700  | -1.24494200 | -0.00337100 |
| O | -1.49490100 | -0.68595700 | -0.01866000 |
| C | -0.38256000 | -1.89193300 | -0.04933300 |
| O | -0.84379000 | -2.98201300 | -0.10031000 |

**TS2''**

|   |             |             |             |
|---|-------------|-------------|-------------|
| O | -0.88464400 | 1.03099200  | 0.77333900  |
| W | 0.43659700  | 0.07228200  | -0.11711200 |
| C | 0.89119100  | -1.39684900 | 0.78959700  |
| C | -1.53896500 | -0.21927500 | -0.14611800 |
| O | -2.66804800 | -0.48751000 | -0.17266400 |

**TS3**

|   |             |             |             |
|---|-------------|-------------|-------------|
| W | 0.31277300  | 1.25964400  | -0.02664000 |
| W | -1.19955700 | -0.94117000 | 0.02851000  |
| C | -0.56867100 | 0.32447600  | 1.32715200  |
| C | -0.58709900 | 0.26961400  | -1.32892400 |
| C | 2.21058400  | 0.34798500  | -0.02044600 |
| O | 3.34874300  | 0.17756800  | -0.02455000 |
| O | 0.29784100  | -2.02291600 | 0.03863300  |
| O | 1.57891800  | -1.68636300 | 0.02324000  |

**TS3'**

|   |             |             |             |
|---|-------------|-------------|-------------|
| W | 1.02213300  | 0.04102500  | 0.04501500  |
| W | -1.66731500 | -0.01638500 | 0.21522500  |
| C | -0.41764600 | 1.33719000  | 0.06300200  |
| C | -0.34827800 | -1.30978400 | 0.27181000  |
| O | 3.13197700  | 0.15316500  | 0.68752000  |
| O | 1.94026600  | -0.05684200 | -1.50121000 |
| C | 3.58676100  | 0.07208600  | -0.45381800 |
| O | 4.47902300  | 0.03536500  | -1.19840900 |

**TS3''**

|   |             |             |             |
|---|-------------|-------------|-------------|
| W | -0.72259700 | -0.14283200 | -0.05493100 |
| W | 1.89216700  | 0.44011600  | -0.00165000 |
| C | 0.51497300  | 0.50957900  | 1.26169100  |
| C | 0.68343500  | 0.37814200  | -1.37315500 |

|   |             |             |             |
|---|-------------|-------------|-------------|
| C | 1.69751300  | -1.66448000 | -0.00415900 |
| O | 2.57577200  | -2.46972200 | 0.03932900  |
| C | -2.23355400 | 1.19231400  | -0.02220200 |
| O | -3.07466800 | 1.98876800  | -0.00637600 |
| O | -0.76907700 | -2.00421600 | 0.57578800  |
| O | 0.34116300  | -2.20762100 | -0.36829100 |

**TS4**

|   |             |             |             |
|---|-------------|-------------|-------------|
| W | 0.86358700  | -0.01606500 | 0.33956600  |
| W | -1.60474300 | -0.00607100 | -0.79604400 |
| C | -0.43480500 | -1.34142400 | -0.24635500 |
| C | -0.41734000 | 1.31975500  | -0.26056500 |
| O | 2.51189700  | -0.02211700 | 1.23651900  |
| C | 1.12980700  | -0.00692200 | 2.33649200  |
| O | 1.22846900  | -0.00157200 | 3.48829400  |

**TS5**

|   |             |             |             |
|---|-------------|-------------|-------------|
| W | -0.28222400 | -1.26753500 | -1.35528700 |
| W | -0.96595500 | 1.18853700  | -0.02187000 |
| C | 0.27588000  | 0.65495700  | -1.41998300 |
| C | -1.60805800 | -0.77564200 | 0.00868600  |
| W | 1.63126000  | 0.49743400  | -0.00762500 |
| W | -0.28523400 | -1.22367900 | 1.39092900  |
| C | 0.27250000  | 0.69975200  | 1.39561200  |
| C | 1.07570200  | -1.57528700 | 0.02460600  |
| C | -1.12202100 | 3.35095000  | -0.06218900 |
| O | -1.31132200 | 4.48114100  | -0.08397000 |
| O | 2.02811000  | 2.37804600  | -0.03668600 |
| O | 1.03225100  | 3.30265300  | -0.05235400 |

**TS5'**

|   |             |             |             |
|---|-------------|-------------|-------------|
| W | 0.00531600  | 0.60197400  | 0.01457900  |
| W | -0.41140600 | -2.08909200 | -0.69847200 |
| C | -1.41485000 | -0.72270600 | 0.32514600  |
| C | 1.00613000  | -0.76722000 | -0.98660300 |
| W | -0.55528900 | -1.29919800 | 2.01350000  |
| W | 1.97770400  | -1.38691700 | 0.69789900  |
| C | 0.43558700  | -2.65732700 | 0.98682800  |
| C | 0.86345000  | 0.01145200  | 1.68556800  |
| O | 3.66838600  | -1.98494700 | 0.95335000  |
| O | 3.67851200  | 0.29322500  | 0.32743500  |
| C | 4.59430300  | -0.47489000 | 0.59262900  |
| O | 5.74649000  | -0.66499100 | 0.71339900  |



**TS5''**

|   |             |             |             |
|---|-------------|-------------|-------------|
| W | -0.21580000 | -1.35747200 | -1.32438000 |
| W | -0.88867300 | 1.08668300  | 0.08838000  |
| C | 0.13939900  | 0.57128900  | -1.50200900 |
| C | -1.38632700 | -0.99554700 | 0.21046700  |
| W | 1.69392900  | 0.51463300  | -0.29079700 |
| W | 0.14006800  | -1.24805700 | 1.42069100  |
| C | 0.53125400  | 0.67954000  | 1.34186300  |
| C | 1.37227000  | -1.51461500 | -0.18571800 |
| C | 0.15189200  | 3.10123400  | -0.22716100 |
| O | -0.22505200 | 4.20178300  | -0.45508100 |
| O | 2.71114300  | 2.12854900  | -0.07006000 |
| O | 1.68933000  | 3.07292800  | -0.58649100 |
| C | -0.80424500 | -2.11499200 | 3.07415900  |
| O | -1.29801600 | -2.63302700 | 3.97863700  |

**TS6 (15\*)**

|   |             |            |             |
|---|-------------|------------|-------------|
| W | -1.51430700 | 0.16293400 | 0.35164700  |
| W | -1.42118300 | 2.82480300 | 1.30206700  |
| C | -2.73485700 | 1.71796900 | 0.32493700  |
| C | -0.20743100 | 1.27179800 | 1.30930800  |
| W | -1.99376600 | 2.32812600 | -1.40230800 |
| W | 0.69223300  | 1.83585600 | -0.42200500 |
| C | -0.71062200 | 3.40689100 | -0.41370900 |
| C | -0.77135100 | 0.78194800 | -1.35753800 |
| O | 2.47421300  | 1.38694600 | -0.71405600 |
| C | 2.32477700  | 3.05435200 | -0.98399900 |
| O | 3.25492600  | 3.68488600 | -1.29155900 |

**TS7**

|   |             |             |             |
|---|-------------|-------------|-------------|
| W | -1.38788300 | 2.03822600  | 0.01150600  |
| W | 0.00195900  | -0.08221300 | 1.19415000  |
| C | -1.87435000 | -0.04700500 | -0.01633500 |
| C | 0.01330100  | 1.98989300  | 1.39116300  |
| W | 1.37174000  | 2.07009500  | 0.01383400  |
| W | 0.00344400  | -0.04946200 | -1.22678600 |
| C | 0.01520900  | 2.02737800  | -1.36687700 |
| C | 1.86618000  | 0.06496300  | -0.01415100 |
| W | -1.42228200 | -2.05534300 | -0.04402600 |
| W | 1.46649000  | -1.99030800 | -0.04122800 |
| C | 0.02394900  | -2.18260700 | -1.37258900 |
| C | 0.02220600  | -2.21855900 | 1.28256200  |
| O | -1.39186800 | 3.96194000  | 0.03835000  |
| O | -0.18376700 | 4.60641000  | 0.05137200  |

|   |            |            |            |
|---|------------|------------|------------|
| C | 1.97742800 | 4.17352900 | 0.04423700 |
| O | 2.36544500 | 5.24950500 | 0.06121900 |

**TS7'**

|   |             |             |             |
|---|-------------|-------------|-------------|
| W | -2.50323400 | 0.63654200  | 0.09550000  |
| W | -0.13943300 | -0.07263400 | -1.34906300 |
| C | -0.80634700 | 1.65812600  | -0.12852900 |
| C | -2.01850000 | -0.95250000 | -1.24286000 |
| W | -1.37078200 | -2.06516100 | 0.15877100  |
| W | 0.01049700  | 0.10936300  | 1.21779600  |
| C | -1.86962800 | -0.75578000 | 1.47155500  |
| C | 0.60531400  | -1.64024100 | 0.01365500  |
| W | 1.19155400  | 1.98045900  | -0.28282500 |
| W | 2.36368200  | -0.66241700 | -0.16101100 |
| C | 2.01043600  | 0.78338600  | 1.09578300  |
| C | 1.85983300  | 0.58864200  | -1.56146400 |
| O | -3.97959000 | 1.55656000  | 0.56499800  |
| O | -5.43965900 | 2.73015900  | -1.16583200 |
| C | -4.48697100 | 2.05776000  | -1.20795600 |
| O | -3.59701500 | 1.46863900  | -1.79648100 |

**TS7''**

|   |             |             |             |
|---|-------------|-------------|-------------|
| W | 1.98203800  | -1.64689000 | -0.39723500 |
| W | -0.36696700 | -0.12181700 | -1.15082800 |
| C | 0.02242300  | -1.77744200 | 0.24349000  |
| C | 1.71359900  | 0.13805700  | -1.40728500 |
| W | 1.46538700  | 1.64562600  | -0.20628800 |
| W | -0.17638300 | 0.13019300  | 1.28347600  |
| C | 1.78320000  | 0.68003200  | 1.55817500  |
| C | -0.57251800 | 1.78892400  | -0.21345500 |
| W | -2.04373700 | -1.60954400 | 0.38299400  |
| W | -2.48807000 | 1.14155100  | 0.11872900  |
| C | -2.32959800 | -0.12232300 | 1.60882100  |
| C | -2.53959700 | -0.42939500 | -1.06039100 |
| O | 3.20108800  | -1.43201800 | 0.90731000  |
| O | 2.33503700  | -2.95538800 | -1.45928700 |
| C | 3.22603400  | 2.80404800  | -0.38717800 |
| O | 4.17153500  | 3.44022200  | -0.52860100 |
| C | 2.92717200  | 0.15056800  | 2.11022300  |
| O | 3.79735900  | 0.10607900  | 2.87521500  |

**TS8**

|   |             |             |             |
|---|-------------|-------------|-------------|
| W | -2.33847500 | -0.83111200 | -0.00440900 |
| W | -0.03071500 | 0.18670300  | 1.29772100  |

|   |             |             |             |
|---|-------------|-------------|-------------|
| C | -0.54090600 | -1.65587500 | 0.12704900  |
| C | -1.98120800 | 0.85067100  | 1.26535700  |
| W | -1.52707200 | 2.00046400  | -0.18785800 |
| W | 0.03292300  | -0.03233800 | -1.26961200 |
| C | -1.91203100 | 0.64849400  | -1.47871100 |
| C | 0.49026200  | 1.78799300  | -0.10160100 |
| W | 1.47675000  | -1.74934800 | 0.19952300  |
| W | 2.35212300  | 0.98900500  | 0.00130900  |
| C | 2.10472900  | -0.49449300 | -1.23001600 |
| C | 2.03846900  | -0.27006100 | 1.43792800  |
| O | -3.78281200 | -2.01465000 | -0.11543500 |
| C | -3.47186300 | -1.80556200 | 1.46021600  |
| O | -4.08982800 | -2.34077300 | 2.29472600  |

**TS8''**

|   |             |             |             |
|---|-------------|-------------|-------------|
| W | -1.95898600 | 1.34448300  | 0.00042500  |
| W | 0.24797900  | -0.00749300 | -1.24956800 |
| C | 0.09937700  | 1.85216100  | 0.00039900  |
| C | -1.77486100 | -0.01949100 | -1.40485600 |
| W | -1.79352100 | -1.37273300 | -0.00050800 |
| W | 0.24803300  | -0.00909900 | 1.24971500  |
| C | -1.77491700 | -0.02058400 | 1.40476100  |
| C | 0.29789100  | -1.82457700 | -0.00031800 |
| W | 2.13406800  | 1.43989800  | 0.00023800  |
| W | 2.28035400  | -1.37644200 | -0.00030100 |
| C | 2.40789400  | 0.06027100  | 1.35216800  |
| C | 2.40798500  | 0.06084900  | -1.35219700 |
| O | -3.83585600 | 1.10047800  | 0.00033200  |
| C | -4.00332200 | -0.56989200 | -0.00031000 |
| O | -5.12000100 | -0.92671500 | -0.00008200 |

**TS9**

|    |             |             |             |
|----|-------------|-------------|-------------|
| Pt | 0.04641200  | -0.33832700 | -0.00550600 |
| C  | -0.84297800 | 1.34396700  | -0.00269700 |
| O  | -1.80109700 | 2.00038400  | -0.00439300 |
| O  | 0.68428500  | 2.26752900  | 0.00652500  |
| O  | 1.55930500  | 1.32113400  | 0.00648200  |

**TS10**

|    |             |             |             |
|----|-------------|-------------|-------------|
| Pt | -0.21861700 | -0.00970100 | 0.28420300  |
| O  | 0.09142800  | -0.00002600 | -1.50255800 |
| C  | 1.72454000  | -0.50395900 | -1.96425800 |
| O  | 1.88928800  | -0.92745400 | -3.01841600 |

**TS11**

|    |             |             |             |
|----|-------------|-------------|-------------|
| Pt | 0.76412500  | -0.38491100 | 0.00024300  |
| Pt | -1.67456000 | 0.08319700  | -0.00015300 |
| C  | 1.48869400  | 1.30123100  | 0.00049400  |
| O  | 1.60381900  | 2.44424200  | 0.00041100  |
| O  | 2.80479700  | -0.83512600 | -0.00012100 |
| O  | 3.35160500  | 0.35666800  | -0.00154400 |

**TS12**

|    |             |             |             |
|----|-------------|-------------|-------------|
| Pt | 0.85346300  | -0.35224700 | 0.00390500  |
| Pt | -1.54475600 | 0.13092700  | -0.00171700 |
| O  | 2.70705000  | -0.77972600 | -0.02132500 |
| C  | 1.97420800  | 1.11639000  | 0.00135500  |
| O  | 2.55240300  | 2.10031200  | -0.00102800 |

**TS13**

|    |             |             |             |
|----|-------------|-------------|-------------|
| Pt | -0.59769600 | -1.19172800 | -0.99080100 |
| Pt | -0.87731500 | 0.87512000  | 0.68584800  |
| Pt | 1.31652800  | 0.55304100  | -0.59797100 |
| Pt | 0.73859000  | -1.27112000 | 1.16370000  |
| O  | 0.43392300  | 3.24249800  | -0.66129300 |
| O  | 1.48580100  | 2.45168300  | -0.86662800 |
| C  | -1.15354500 | 2.61673600  | -0.13310800 |
| O  | -1.92368500 | 3.44374100  | -0.41768200 |

**TS14**

|    |             |             |             |
|----|-------------|-------------|-------------|
| Pt | -0.74489000 | 1.37199900  | 0.65097400  |
| Pt | 1.45077200  | -0.07362800 | 0.41574100  |
| Pt | -0.38812800 | -0.10734400 | -1.42728900 |
| Pt | -0.90583700 | -1.18145400 | 0.85528000  |
| O  | 3.26948400  | -0.19297700 | 0.12661600  |
| C  | 3.80643500  | -0.34616100 | -1.74613500 |
| O  | 4.92423100  | -0.37344500 | -1.98371400 |

**TS15**

|    |             |             |             |
|----|-------------|-------------|-------------|
| Pt | -1.22171100 | 0.12673200  | 1.49902400  |
| Pt | -1.59922600 | 1.34104400  | -0.73167400 |
| Pt | 1.28083100  | -0.37274200 | 1.59454500  |
| Pt | 1.02819100  | 1.28986400  | -0.46001800 |
| Pt | -1.64542900 | -1.21962200 | -0.65080900 |
| Pt | 0.88759900  | -1.30451900 | -0.87869800 |
| C  | 2.93555300  | 1.26136400  | -0.64249800 |
| O  | 3.86699900  | 1.95245900  | -0.55761900 |
| O  | 3.53507200  | -0.24039400 | -1.22025800 |

|   |            |             |             |
|---|------------|-------------|-------------|
| O | 2.77628100 | -1.30046300 | -1.37086000 |
|---|------------|-------------|-------------|

**TS16**

|    |             |             |             |
|----|-------------|-------------|-------------|
| Pt | 0.18963400  | 0.02796900  | 1.55149800  |
| Pt | 0.27568500  | -1.63074600 | -0.50833000 |
| Pt | -0.78647000 | 1.95933300  | 0.12513200  |
| Pt | -1.97549400 | -0.36297400 | -0.08014600 |
| Pt | 2.47663100  | -0.34474900 | 0.33897700  |
| Pt | 0.87214700  | 0.74346500  | -1.38579300 |
| O  | -3.80651500 | 0.10501800  | -0.37370500 |
| C  | -3.25940800 | -1.74899000 | -0.04964800 |
| O  | -4.00722800 | -2.61818000 | 0.00789900  |

**3\***

|   |             |             |             |
|---|-------------|-------------|-------------|
| W | 0.02356800  | -1.29461100 | -1.31816700 |
| W | 1.55053000  | 0.62553800  | 0.22549100  |
| C | 1.30444700  | -1.37318200 | 0.18884400  |
| C | 0.13564100  | 0.56094300  | -1.41088500 |
| W | -0.14113500 | -1.25938600 | 1.52546600  |
| W | -1.35181300 | 0.83919400  | -0.01064500 |
| C | 0.02810400  | 0.63421700  | 1.54124800  |
| C | -1.43650500 | -1.15927300 | 0.00503100  |
| O | -2.76711400 | 2.03437300  | 0.53709800  |
| O | -2.55434000 | 2.07892600  | -0.90440000 |
| O | 3.13497600  | 1.21632200  | 0.83536700  |
| O | 2.28555200  | 2.42185000  | -1.03617300 |
| C | 3.33115600  | 2.64792500  | -0.45001400 |
| O | 4.32582200  | 3.21929000  | -0.25823400 |

**7\***

|   |             |             |             |
|---|-------------|-------------|-------------|
| W | -0.71818700 | -0.97418000 | 1.50228900  |
| W | -0.93609500 | 1.40046700  | -0.08602600 |
| C | -1.84842200 | -0.42334200 | -0.03948100 |
| C | 0.21969800  | 0.68195400  | 1.50268500  |
| W | -0.54860400 | -1.14306000 | -1.32712300 |
| W | 1.61812300  | 0.01495000  | 0.21568900  |
| C | 0.28920200  | 0.52320800  | -1.45278100 |
| C | 0.57745500  | -1.70666700 | 0.21746700  |
| O | 3.05566400  | 1.21648700  | -1.13721800 |
| O | 3.28906100  | -0.04253900 | 0.87673700  |
| O | -1.67900600 | 2.96105200  | -0.22757600 |
| C | 4.08882400  | 1.05806000  | -0.50928300 |
| O | 5.22430700  | 1.19268300  | -0.29917500 |

**11\***

|   |             |             |             |
|---|-------------|-------------|-------------|
| W | -0.10569300 | -1.04752200 | 1.44929600  |
| W | -1.32162700 | 1.23639600  | 0.19735000  |
| C | -1.73847800 | -0.75558800 | 0.37238100  |
| C | 0.34893000  | 0.80127500  | 1.33255600  |
| W | -0.75495900 | -1.13191300 | -1.30140500 |
| W | 1.42394600  | 0.54212400  | -0.37619800 |
| C | -0.36171800 | 0.69834500  | -1.53480800 |
| C | 0.85301100  | -1.43682500 | -0.22546500 |
| O | 3.01289300  | 1.43646800  | -0.78857100 |
| O | -2.40801800 | 2.56775200  | 0.42418300  |
| C | 3.41626500  | 0.23800800  | 0.20680900  |
| O | 4.52120300  | 0.04533400  | 0.53714500  |
